# Supplementary material for: High-energy-density shape memory materials with ultrahigh strain for reconfigurable artificial muscles
Source: Royal Society of Chemistry journal article supplement (doi:10.1039/d1tb01350e), 2021-01-01
Supplement: d1tb01350e10.pdf [file d1tb01350e10.pdf]

**High-Energy-Density Shape Memory Materials with Ultrahigh Strain for  
Reconfigurable Artificial Muscles**

*Xu Zheng<sup>1</sup>, Yujie Chen<sup>1\*</sup>, Chi Chen<sup>1</sup>, Zhen Chen<sup>1</sup>, Yutong Guo<sup>1</sup>, Hua Li<sup>1</sup>, Hezhou  
Liu<sup>1\*</sup>*

X. Zheng, Y. Chen, C. Chen, Z. Chen, Y. Guo, H. Li, H. Liu

<sup>1</sup> State Key Laboratory of Metal Matrix Composites, School of Materials Science and  
Engineering, Shanghai Jiao Tong University, Shanghai 200240, China

E-mail: yujiechen@sjtu.edu.cn; hzhliu@sjtu.edu.cn

## **Experimental Section**

### **1 Materials**

PCL-diOH ( $M_n = 20\,000\text{ g mol}^{-1}$ ) was purchased from the Shanghai D & B laboratory. PEG-diOH ( $M_n = 1\,000\text{ g mol}^{-1}$ ) was purchased from Sinopharm Chemical Reagent. *N,N*-Dimethylformamide (DMF) and Hexamethylene diisocyanate (HDI) were purchased from Shanghai Titan Technology Co., Ltd. *N,N,N',N'*-tetrakis(2-hydroxypropyl) ethylenediamine (HPED) and Triethanolamine (TEA) was purchased from Beijing Innochem Science & Technology Co.,Ltd. 4A molecular sieve was purchased from Energy Chemical Co., Ltd. Other reagents were purchased from Shanghai Macklin Biochemical Co., Ltd. Except for special instructions, all reagents were used as received.

### **2 Preparation of Fe<sub>3</sub>O<sub>4</sub> nanoparticles**

The hydrothermal method is a convenient and efficient method to synthesize Fe<sub>3</sub>O<sub>4</sub> NPs according to the reported literature.<sup>1, 2</sup> Typically, FeCl<sub>3</sub>·6H<sub>2</sub>O (0.01 mol) and sodium acetate (0.1 mol) was first added in ethylene glycol (140 mL) by ultrasound to obtain a dark brown solution. After that, the mixture was stirred vigorously for 1 h to ensure that they were completely dissolved. Finally, the mixture was sealed in a Teflon-lined stainless-steel autoclave, which would then be heated to 200 °C and kept for 8 h. The obtained black products were cooled to room temperature naturally and washed with ethanol three times through centrifugation, followed by drying in an oven at 80 °C for 12 h.

### **3 Synthesis of the PUPCLPEG**

PCL-diOH, PEG-diOH, HDI, HPED and TEA should be intensively dry for the whole night. A certain amount of PCL-diOH and PEG-diOH were dissolved in DMF, stirring at 80 °C to get a homogeneous solution. (Table S1) Then HDI was added into the transparent solution and pre-polymerize for 30 min under vacuum, which was before the addition of HPED and TEA. Subsequently, the mixture was stirred for 5 min after adding ditin butyl dilaurate (DBTDL). After the pre-polymerization reaction was completed, the mixture became sticky and was decanted into poly(tetrafluoroethylene) (PTFE) molds. Finally, reacting at 80 °C for 24 h, the sample could be taken out for later use. What is more, different geometries could be achieved by using different molds such as film and strip. The whole process was finished in the nitrogen or vacuum atmosphere to avoid the side reaction of HDI and H<sub>2</sub>O.

#### **4 Fabrication of the PUPCLPEG/Fe<sub>3</sub>O<sub>4</sub> shape memory composite**

A series of PUPCLPEG/Fe<sub>3</sub>O<sub>4</sub> shape memory composites with different doped amounts (0%, 0.25%, 0.5%, 1%, 2% and 5wt%) were fabricated by mixing certain amounts of Fe<sub>3</sub>O<sub>4</sub> into the polyurethane matrix. Fe<sub>3</sub>O<sub>4</sub> NPs were dispersed in the mixture by sonication before it became sticky. Besides, 2 wt% of fumed silica (Macklin) with an average size of 7–40 nm is added to ensure good mixing of the matrix resin with the Fe<sub>3</sub>O<sub>4</sub> NPs.

#### **5 Physicochemical Characterization**

The Wide-angle X-ray diffraction (WAXD) patterns were performed by D8 ADVANCE (Da Vinci) with 2θ in the range of 5~70° with a step size of 5° min<sup>-1</sup> at room temperature. The Fourier transform infrared (FT-IR) spectra of samples were

obtained by FT-IR spectrometer (Spectrum 100, USA). The microstructure and EDS mapping of the composite was observed by TESCAN Mira3 field emission scanning electron microscope (FE-SEM). Elastic modulus maps of samples were recorded by Atomic force microscope (AFM) under ambient conditions.

## **6 Thermodynamics Characterization**

The Differential scanning calorimetry (DSC) were performed by Q2000 (TA instruments) at the heating/cooling rate of  $5\text{ }^{\circ}\text{C min}^{-1}$  under the  $\text{N}_2$  atmosphere. The dynamic mechanical analysis (DMA) was tested using DMA Q850 (TA instruments) in tension mode at a heating rate of  $5\text{ }^{\circ}\text{C min}^{-1}$  at a constant frequency of 1 Hz with a peak-to-peak amplitude of 0.1%. The WAXD patterns with variable temperature were tested by D8 ADVANCE (Bruker) with  $2\theta$  in the range of  $5 \sim 70^{\circ}$  at a scanning rate of  $5^{\circ}\text{ min}^{-1}$  and were maintained at testing temperature points ( $20\text{ }^{\circ}\text{C}$ ,  $40\text{ }^{\circ}\text{C}$ ,  $60\text{ }^{\circ}\text{C}$ , and  $80\text{ }^{\circ}\text{C}$ ) for 20 min. The polarizing optical microscopy (POM) were performed on DM LP (Leica) from  $25\text{ }^{\circ}\text{C}$  to  $80\text{ }^{\circ}\text{C}$ .

## **7 Mechanical Testing**

Mechanical tensile tests were carried out using a microcomputer-controlled electronic universal testing machine (LD23 503, Shenzhen, China) at ambient temperature. The specifications of the tensile sample for the test were  $85 \times 10 \times 1.5\text{ mm}^3$ . The strain rate was  $5\text{ mm min}^{-1}$

## **8 Shape memory and artificial muscle behavior**

Shape memory performance tests were recorded by using DMA Q850 (TA instruments) through a pre-set program. The temperature range is from  $10$  to  $60\text{ }^{\circ}\text{C}$  at

the heating rate of 5 °C min<sup>-1</sup>. (Samples: about 8 × 5 × 0.8 mm<sup>3</sup>). And the artificial muscle behavior tests were carried out by vertically fixing the sample connected to the load with clamps on the iron platform (the weight of the clamps are 2.8400 g and 1.2800 g).

### **9 Photo-responsive thermogenesis efficiency and Photo-response performance**

The infrared thermal images of PUPCLPEG/Fe<sub>3</sub>O<sub>4</sub> composite were taken with a visual IR thermometer (FLIR E50, FLIR Systems). The polymer films were initially synthesized in a rectangular mold of 40 × 40 mm<sup>2</sup> and then cut into specific shape according to the test requirements. The Xenon lamp light source with the bulb power of 300 W (Shanghai Yuming instrument co., LTD) was used for the near-infrared radiation (NIR) response test, and the output band was between 800 nm and 900 nm. 808 nm NIR laser was generated by a light source (MLD-XF-808nm-10W-BL22232) from Changchun New Industries Optoelectronics Tech Co., Ltd.

### **Supplementary 1: Calculation of phase domain size from SAXS**

The distance between two neighboring nanoscale domains (D) can be roughly calculated by the following Equation S1.

$$D = 2\pi/q^* \quad (1)$$

### **Supplementary 2: Shape memory behavior and artificial muscle performance test**

$$R_f = \left(1 - \frac{L_2 - L_1}{L_1}\right) \times 100\% \quad (2)$$

$$R_r = \left(1 - \frac{L_3 - L_0}{L_0}\right) \times 100\% \quad (3)$$

Where L<sub>0</sub> represents the initial length, L<sub>1</sub> represents the deformation length at the room

temperature,  $L_2$  represents the fixation length after partial elastic contraction, and  $L_3$  represents the final length after the recovery process.

$$W = \frac{M_{load} \times g \times \rho \times (L_2 - L_3)}{M} \quad (4)$$

Where  $M_{load}$  and  $M$  represent the mass of the load and deformation section of the sample, respectively.  $\rho$  represents the density of sample, which is measured by Archimedes method. Meanwhile,  $g$  represents the acceleration of gravity, and its value is  $9.8 \text{ N kg}^{-1}$ .

Supplementary figures, tables and movies

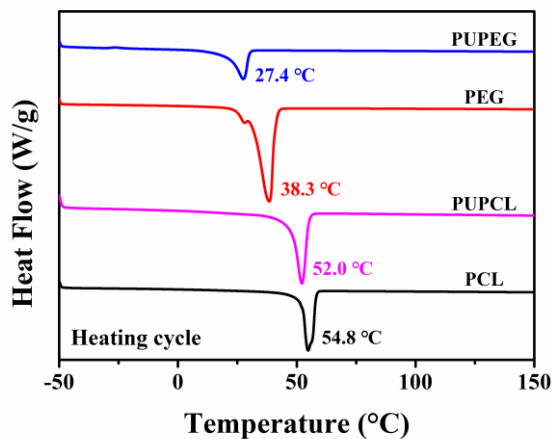

Figure S1 DSC curves in a heating cycle of PCL, PUPCL, PEG, PUPEG.

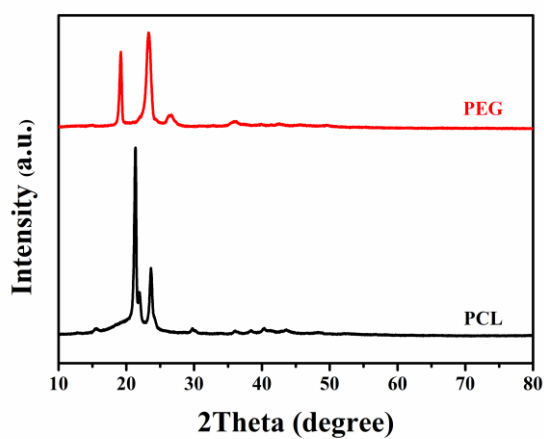

Figure S2 WAXD patterns of PCL and PEG.

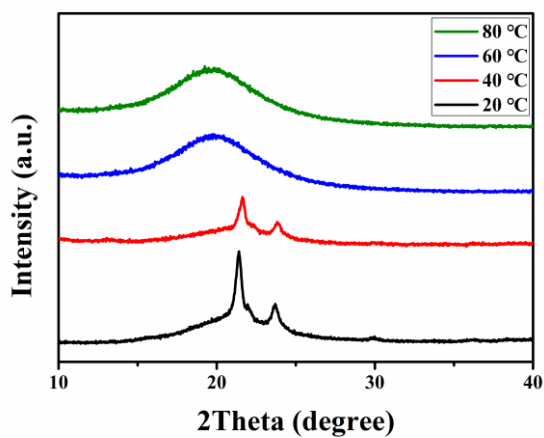

Figure S3 WAXD patterns of the PUPCLPEG under the heating circumstance.

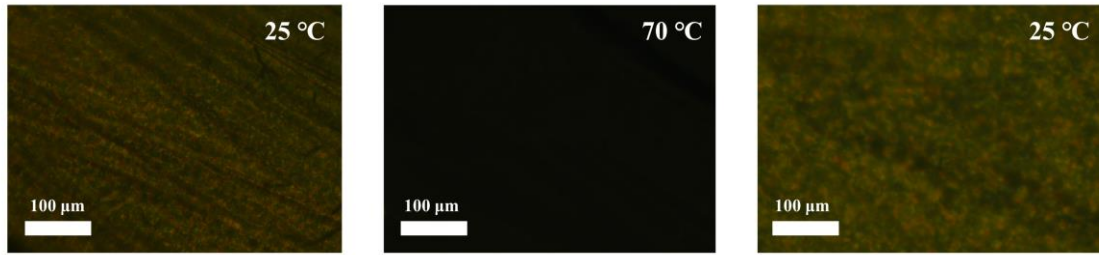

**Figure S4** POM images of PUPCLPEG (7:3), recorded during the heating process and the cooling process.

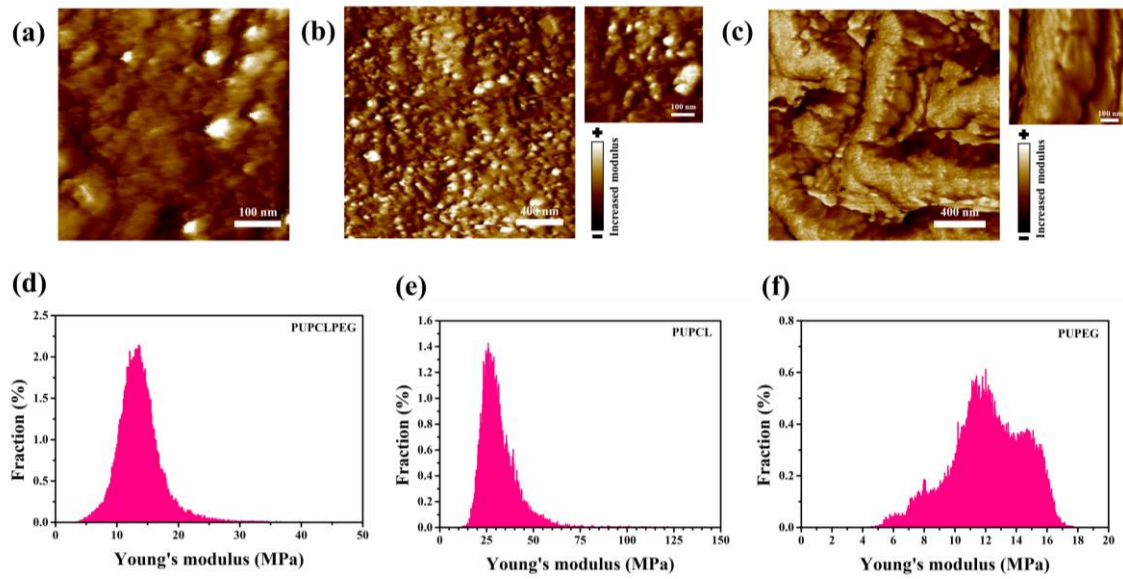

**Figure S5** Elastic modulus maps of PUPCLPEG (7:3) (a), PUPCL (b), PUPEG (c), and Elastic modulus histograms of PUPCLPEG (7:3) (d), PUPCL (e), PUPEG (f) recorded by AFM.



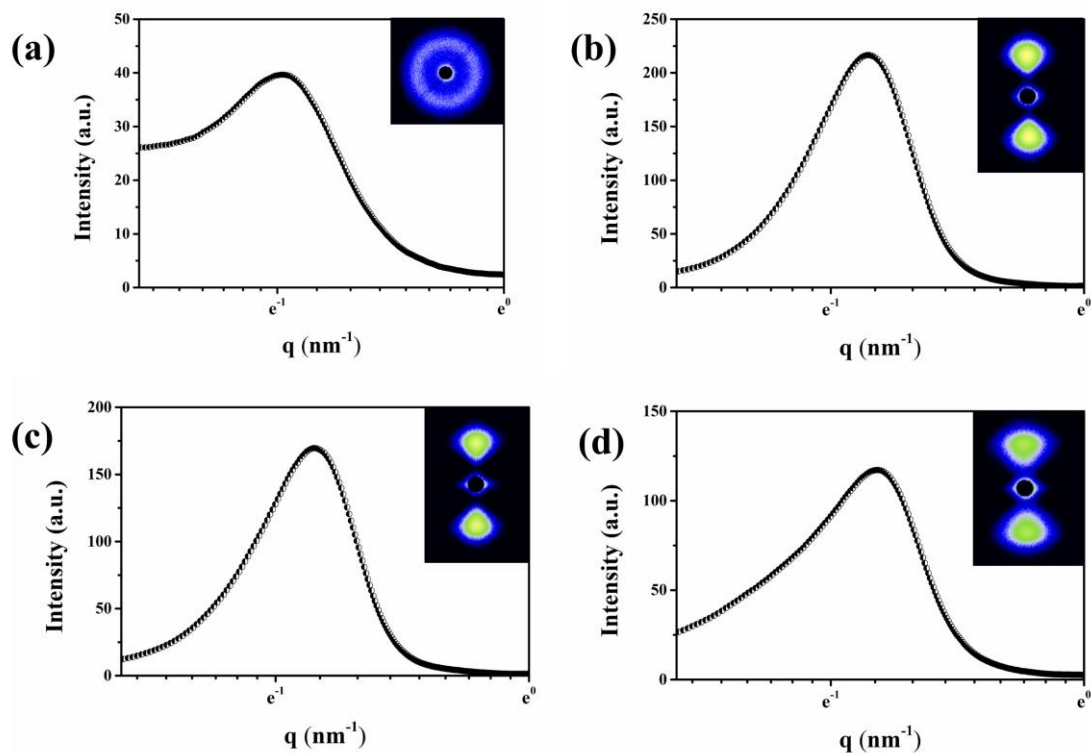

**Figure S6** SAXS patterns and 2D-SAXS images (inset) of PUPCLPEG (7:3) at strains of 0% (a), 200% (b), 400% (c), 600% (d).

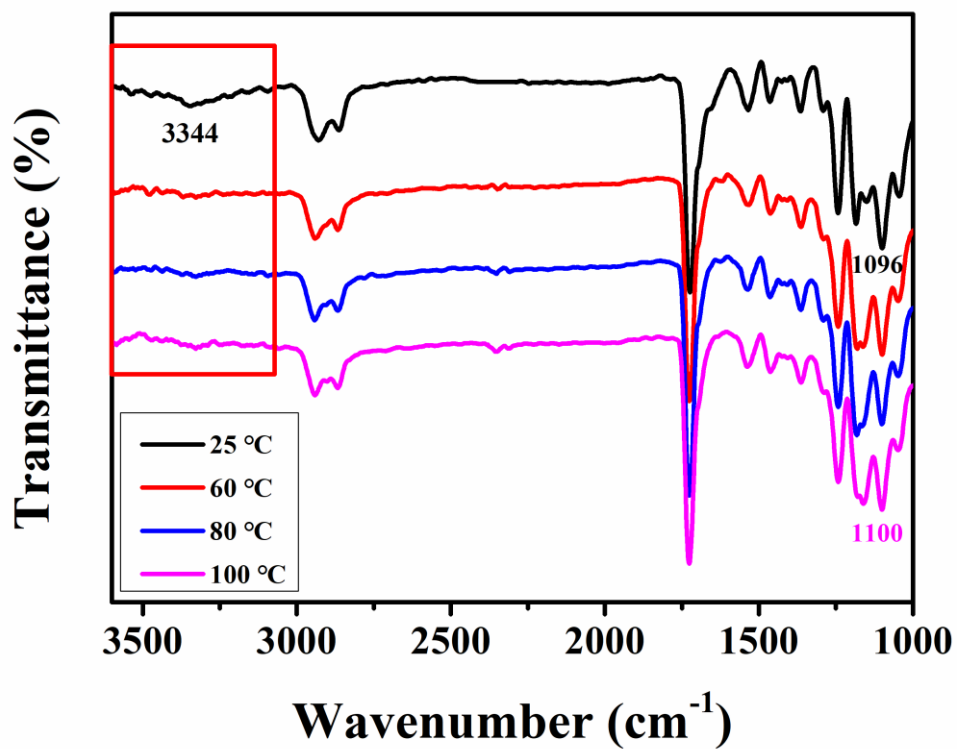

**Figure S7** FTIR spectra of PUPCLPEG at different temperatures.

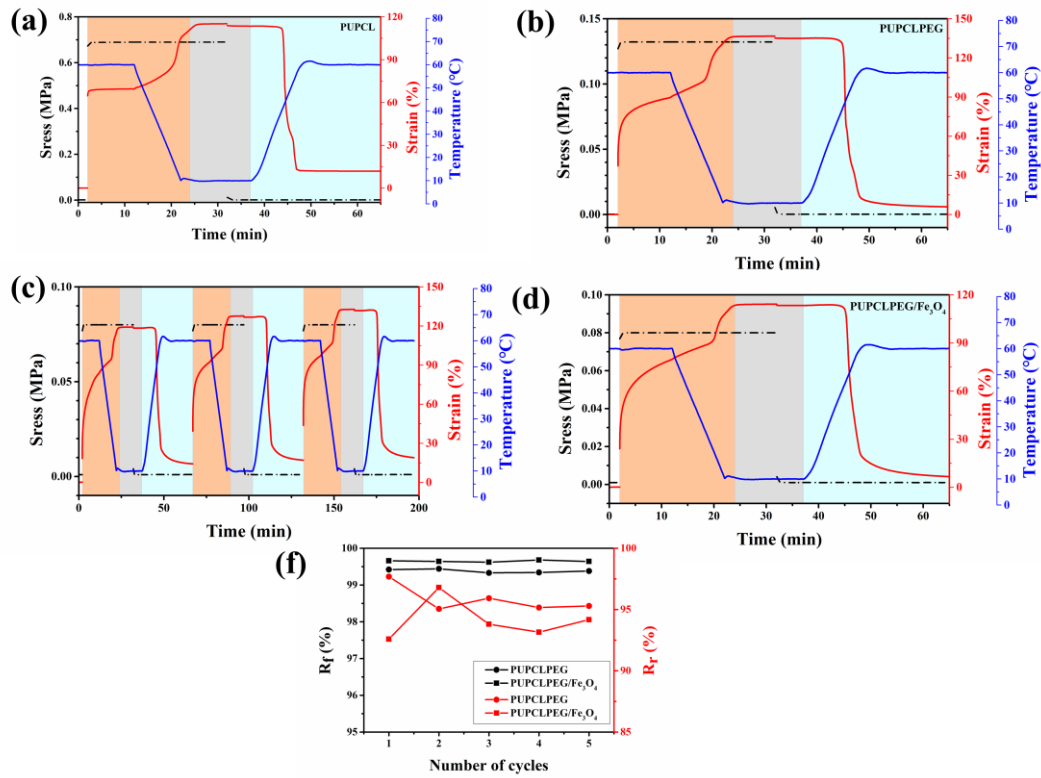

**Figure S8** Characterization of shape memory behavior using DMA. Temperature, strain, and stress as functions of time for (a) PUPCL in one cycle (b) PUPCLPEG in one cycle and (c) PUPCLPEG in three cycles (d) PUPCLPEG / Fe<sub>3</sub>O<sub>4</sub> in the first cycle. (f) R<sub>f</sub> and R<sub>r</sub> as functions of cycle number for PUPCLPEG and PUPCLPEG / Fe<sub>3</sub>O<sub>4</sub>. In (a-d), black dashed lines: stress; red solid lines: strain; blue solid lines: temperature.

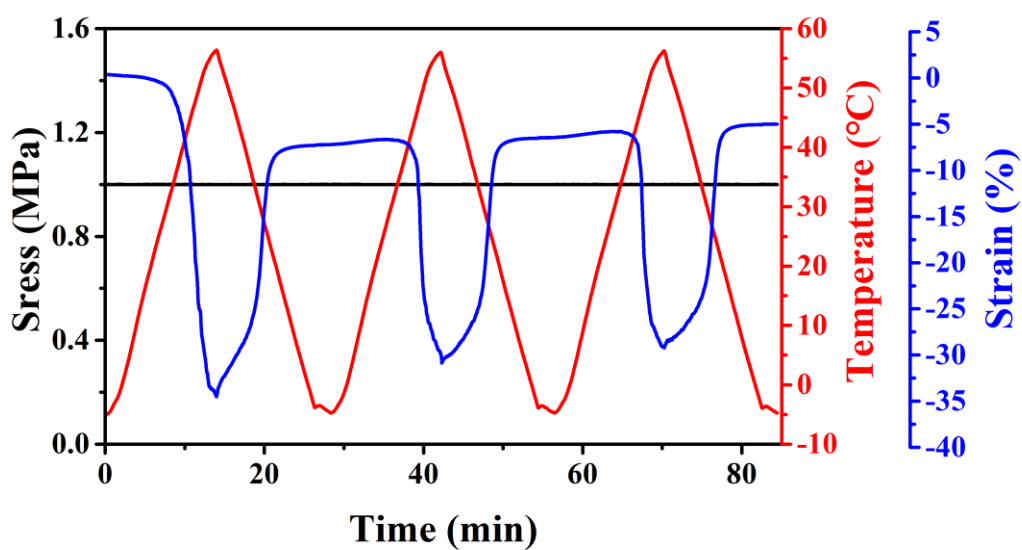

**Figure S9** Reversible shape memory effect of PUPCLPEG under the stress of 1.0 MPa recorded by DMA

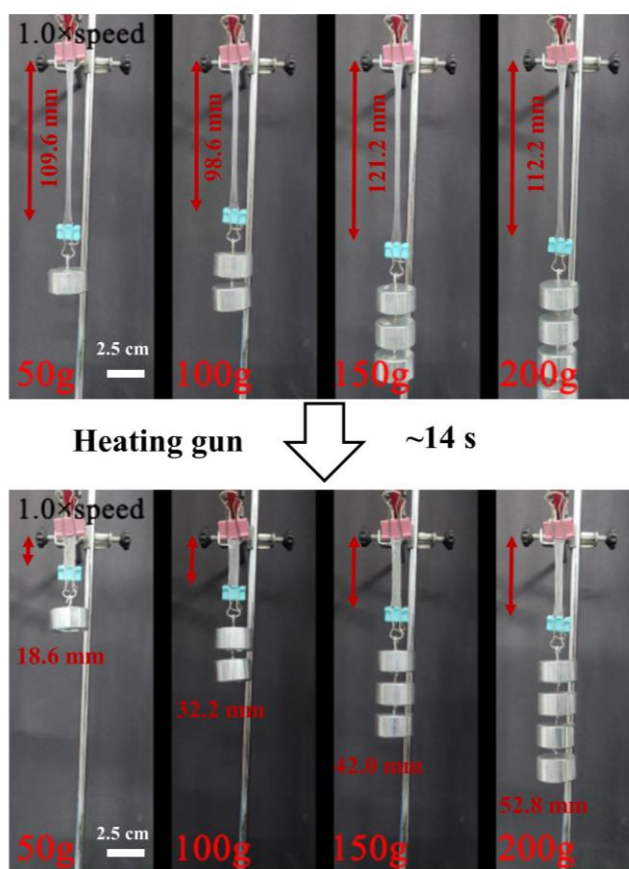

**Figure S10** Photos of a PUPCLPEG (7:3) strip lifting different weight load by

employing a heating gun.

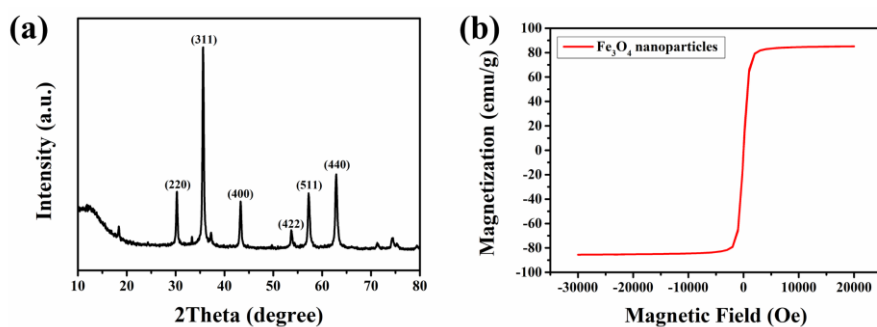

**Figure S11** XRD patterns (a) and static magnetic hysteresis loops (b) of Fe<sub>3</sub>O<sub>4</sub> nanoparticles.

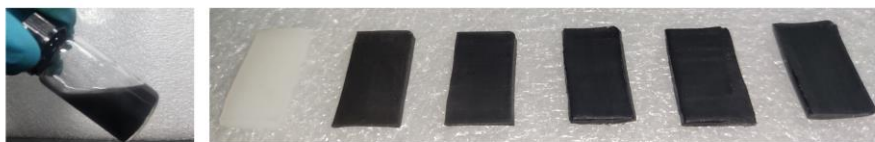

**Figure S12** (a) Photograph of the mixture of polymer and Fe<sub>3</sub>O<sub>4</sub> nanoparticles before polymerization. (b) Photograph of the PUPCLPEG/Fe<sub>3</sub>O<sub>4</sub> shape memory composites with different doped amount (0%, 0.25%, 0.5%, 1%, 2% and 5wt%).

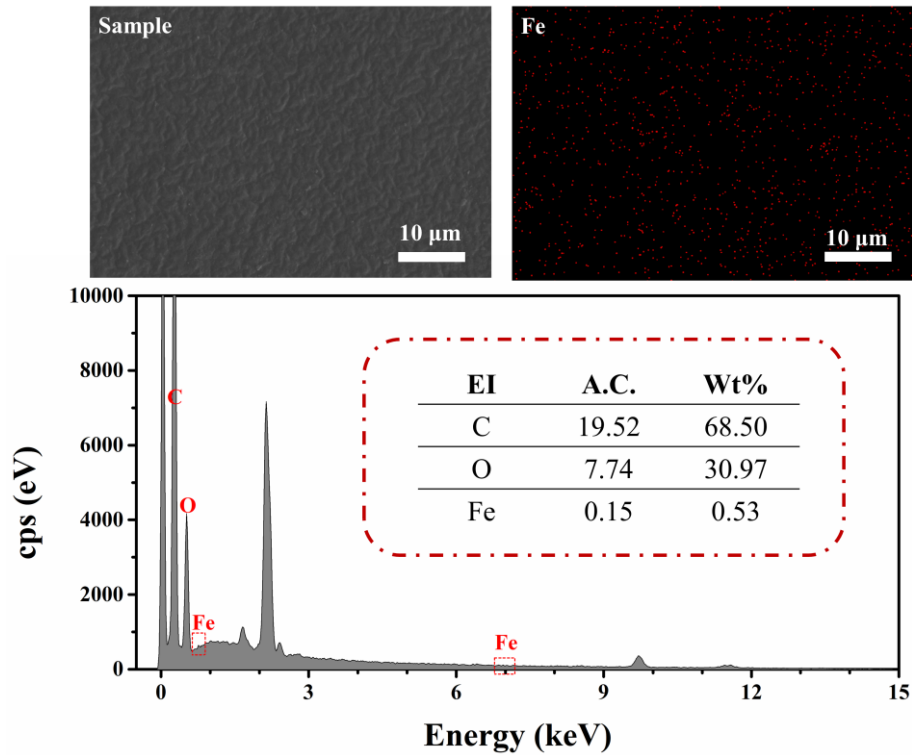

**Figure S13** SEM image of the surface and EDS analysis of the component of 0.5 % PUPCLPEG/Fe<sub>3</sub>O<sub>4</sub> shape memory composite (El for element, A.C. for apparent concentration).

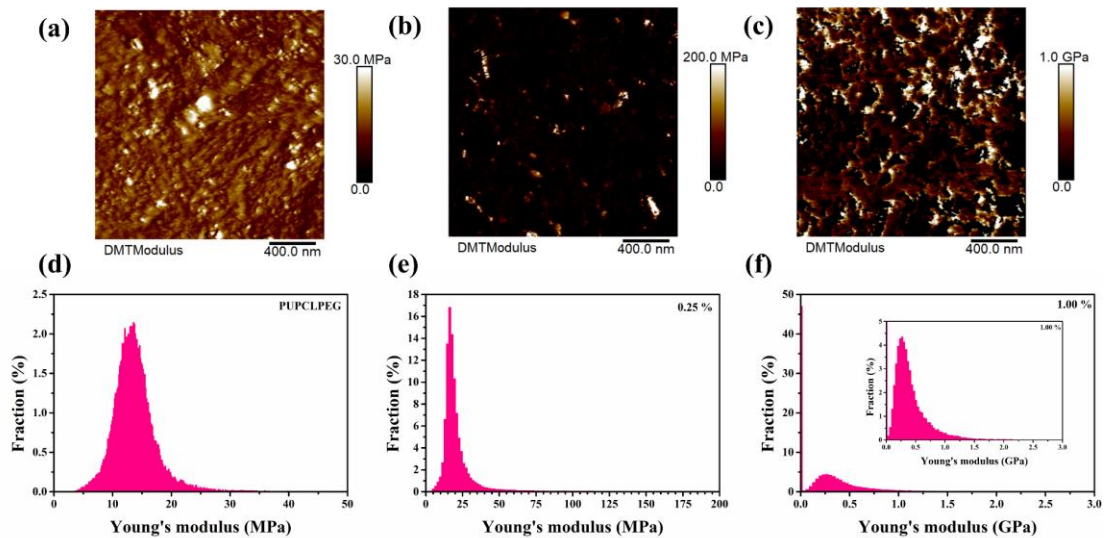

**Figure S14** Elastic modulus maps of PUPCLPEG(7:3) (a), 0.25 % PUPCLPEG/Fe<sub>3</sub>O<sub>4</sub> (b), 1.0 % PUPCLPEG/Fe<sub>3</sub>O<sub>4</sub> (c) and Elastic modulus histogram of PUPCLPEG(7:3) (d), 0.25 % PUPCLPEG/Fe<sub>3</sub>O<sub>4</sub> (e), 1.0 % PUPCLPEG/Fe<sub>3</sub>O<sub>4</sub> (f).

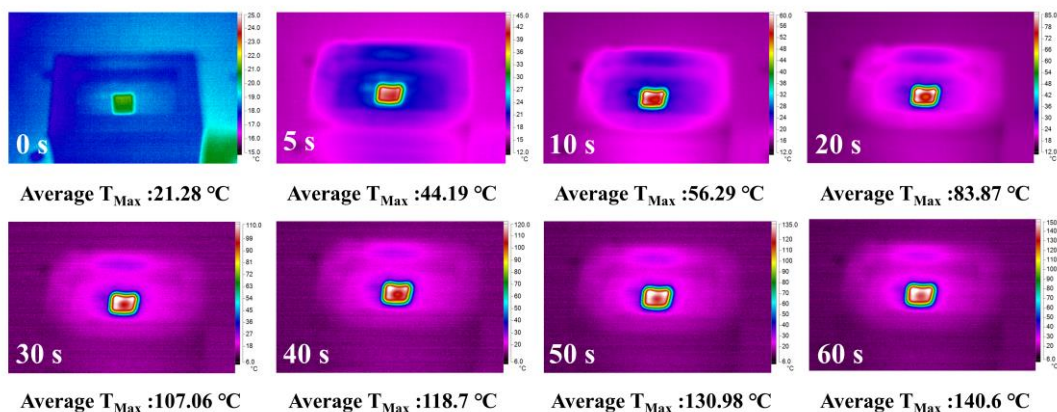

**Figure S15** The IR mapped temperature distribution of 0.5 % PUPCLPEG/ $Fe_3O_4$  shape memory composite, the surface temperatures change with irradiation time. The light intensity is  $1000 \text{ mW cm}^{-2}$ .

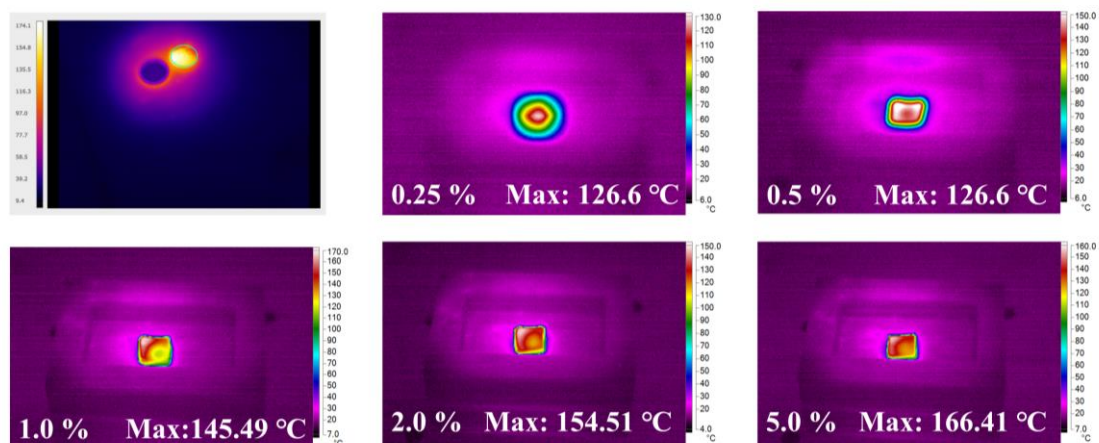

**Figure S16** The IR mapped temperature distribution of  $Fe_3O_4$  and PUPCLPEG/ $Fe_3O_4$  shape memory composite with different doped amount (0.25%, 0.5%, 1%, 2% and 5wt%). The light intensity is  $1000 \text{ mW cm}^{-2}$ .

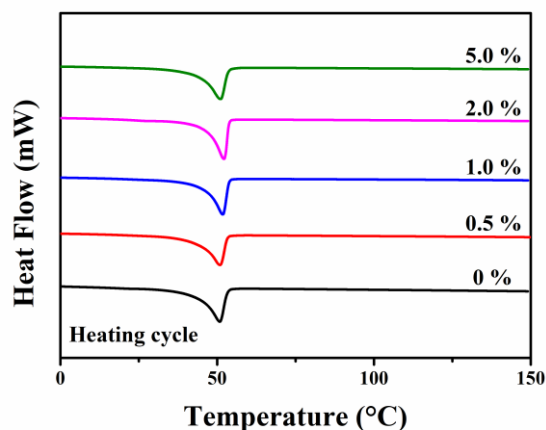

**Figure S17** DSC curves in a heating cycle of PUPCLPEG/Fe<sub>3</sub>O<sub>4</sub> shape memory composite with different doped amount (0%, 0.5%, 1%, 2% and 5wt%).

**Table S1.** Sample numbers with various proportions and mechanical properties of SMPUs (*f*: number of functional groups) tested by tensile test

|              | PCL( <i>f</i> =2)<br>[mmol] | PEG( <i>f</i> =2)<br>[mmol] | HPED( <i>f</i> =4)<br>[mmol] | TEA( <i>f</i> =3)<br>[mmol] | HDI( <i>f</i> =2)<br>[mmol] | Young's<br>Modulus<br>E[MPa] | Strain at<br>break<br>$\epsilon_B$ [%] | Tensile<br>strength<br>$\sigma_B$ [MPa] |
|--------------|-----------------------------|-----------------------------|------------------------------|-----------------------------|-----------------------------|------------------------------|----------------------------------------|-----------------------------------------|
| <b>PUPCL</b> | 0.05 (1.0 g)                | -                           | 0.2                          | 0.1                         | 0.6                         | 133.98                       | 221.8                                  | 9.39                                    |
| <b>9:1</b>   | 0.045 (0.9 g)               | 0.1 (0.1 g)                 | 0.2                          | 0.1                         | 0.695                       | 39.12                        | 706.6                                  | 12.18                                   |
| <b>8:2</b>   | 0.04 (0.8 g)                | 0.2 (0.2 g)                 | 0.2                          | 0.1                         | 0.790                       | 33.17                        | 779.7                                  | 10.96                                   |
| <b>7:3</b>   | 0.035 (0.7 g)               | 0.3 (0.3 g)                 | 0.2                          | 0.1                         | 0.885                       | 17.94                        | 947.0                                  | 11.68                                   |
| <b>6:4</b>   | 0.03 (0.6 g)                | 0.4 (0.4 g)                 | 0.2                          | 0.1                         | 0.980                       | 13.21                        | 729.2                                  | 6.84                                    |
| <b>5:5</b>   | 0.025 (0.5 g)               | 0.5 (0.5 g)                 | 0.2                          | 0.1                         | 1.075                       | 11.45                        | 486.7                                  | 4.78                                    |
| <b>PUPEG</b> | -                           | 1.0 (1.0 g)                 | 0.2                          | 0.1                         | 1.550                       | 0.49                         | 299                                    | 1.1*10 <sup>-3</sup>                    |

**Table S2. Shape memory performance of PUPCL, PUPCLPEG, and PUPCLPEG/  
Fe<sub>3</sub>O<sub>4</sub>.**

| No. | sample                                   | L <sub>0</sub> [mm] | L <sub>1</sub> [mm] | L <sub>2</sub> [mm] | L <sub>3</sub> [mm] | R <sub>f</sub> [%] | R <sub>r</sub> [%] |
|-----|------------------------------------------|---------------------|---------------------|---------------------|---------------------|--------------------|--------------------|
| 1   | PUPCL                                    | 8.051               | 17.268              | 17.134              | 8.930               | 99.22              | 89.08              |
| 2   | PUPCLPEG(7:3)                            | 8.048               | 17.013              | 16.915              | 8.235               | 99.42              | 97.68              |
| 3   | PUPCLPEG(7:3)                            | 8.026               | 17.887              | 17.787              | 8.423               | 99.44              | 95.05              |
| 4   | PUPCLPEG(7:3)                            | 8.499               | 18.522              | 18.398              | 8.846               | 99.33              | 95.92              |
| 5   | PUPCLPEG(7:3)                            | 8.075               | 18.147              | 18.028              | 8.466               | 99.34              | 95.16              |
| 6   | PUPCLPEG(7:3)                            | 8.509               | 17.328              | 17.220              | 8.910               | 99.38              | 95.29              |
| 7   | PUPCLPEG/ Fe <sub>3</sub> O <sub>4</sub> | 8.490               | 18.425              | 18.363              | 9.120               | 99.66              | 92.58              |
| 8   | PUPCLPEG/ Fe <sub>3</sub> O <sub>4</sub> | 8.504               | 16.591              | 16.532              | 8.777               | 99.64              | 96.79              |
| 9   | PUPCLPEG/ Fe <sub>3</sub> O <sub>4</sub> | 7.931               | 16.915              | 16.850              | 8.423               | 99.62              | 93.80              |
| 10  | PUPCLPEG/ Fe <sub>3</sub> O <sub>4</sub> | 6.497               | 13.173              | 13.131              | 6.942               | 99.68              | 93.15              |
| 11  | PUPCLPEG/ Fe <sub>3</sub> O <sub>4</sub> | 7.925               | 16.395              | 16.336              | 8.837               | 99.64              | 94.17              |



**Table S3. Artificial muscle behavior test of PUPCLPEG. ( $g = 9.8 \text{ N kg}^{-1}$ )**

| <b>No.</b> | <b>L<sub>0</sub>[mm]</b> | <b>L<sub>2</sub>[mm]</b> | <b>L<sub>3</sub>[mm]</b> | <b>ΔL[mm]</b> | <b>M<sub>load</sub>[g]</b> | <b>M[g]</b> | <b>ρ[g cm<sup>-3</sup>]</b> | <b>W[kJ kg<sup>-1</sup>]</b> |
|------------|--------------------------|--------------------------|--------------------------|---------------|----------------------------|-------------|-----------------------------|------------------------------|
| <b>1</b>   | 10.2                     | 65.0                     | 16.2                     | 48.8          | 52.840                     | 0.170       | 1.137                       | 169.013                      |
| <b>2</b>   | 10.2                     | 55.0                     | 19.5                     | 35.5          | 102.840                    | 0.170       | 1.137                       | 239.292                      |
| <b>3</b>   | 10.2                     | 53.4                     | 33.0                     | 20.4          | 152.840                    | 0.170       | 1.137                       | 204.364                      |
| <b>4</b>   | 10.2                     | 62.5                     | 51.0                     | 11.5          | 202.840                    | 0.170       | 1.137                       | 152.894                      |
| <b>5</b>   | 10.0                     | 100.0                    | 41.0                     | 59.0          | 151.280                    | 0.186       | 1.137                       | 534.696                      |
| <b>6</b>   | 10.5                     | 98.6                     | 32.2                     | 66.4          | 101.280                    | 0.186       | 1.137                       | 402.870                      |
| <b>7</b>   | 12.0                     | 109.6                    | 18.6                     | 91.0          | 51.280                     | 0.186       | 1.137                       | 279.552                      |
| <b>8</b>   | 13.8                     | 121.2                    | 42.0                     | 79.2          | 151.280                    | 0.186       | 1.137                       | 717.762                      |
| <b>9</b>   | 13.8                     | 112.2                    | 52.8                     | 59.4          | 201.280                    | 0.186       | 1.137                       | 716.243                      |

**Movie S1.** Shape memory behavior induced by heat at 60 °C. The movie is shown with 1.0 × speed.

**Movie S2.** Artificial muscle performance induced by heat at 60 °C with the varied load. The movie is shown with 1.0 × speed.

**Movie S3.** The reversible actuation of the artificial muscle materials induced by heating at 60 °C and cooling at 0 °C. The movie is shown with 1.0 × speed.

**Movie S4.** The application of the artificial muscle materials on a puppet arm. The movie is shown with 1.0 × speed.

**Movie S5.** Photothermal-driven contraction of the composite induced by NIR at 800~900 nm. The movie is shown with 1.0 × speed.

**Movie S6.** Photothermal-driven reversible bending of the composite induced by NIR laser at 808 nm. The movie is shown with 1.0 × speed.

**Movie S7.** The programmable deformation process of “S J T U” induced by NIR laser at 808 nm. The movie is shown with 1.0 × speed.

**Movie S8.** The blending process with different loading induced by NIR laser at 808 nm. The movie is shown with 1.0 × speed.

**Movie S9.** The programmed and precise folding of a box induced by NIR laser at 808 nm. The movie is shown with 2.0 × speed.

1. J. Liu, Z. Sun, Y. Deng, Y. Zou, C. Li, X. Guo, L. Xiong, Y. Gao, F. Li and D. Zhao, *Angew Chem Int Ed Engl*, 2009, **48**, 5875-5879.
2. K. Wang, Y. Chen, H. Li, B. Chen, K. Zeng, Y. Chen, H. Chen, Q. Liu and H. Liu, *ACS Applied Nano Materials*, 2019, **2**, 8063-8074.
